# Supplementary material
Source: publisher site journal article supplement (https://www.dovepress.com/get_supplementary_file.php?f=341917.docx)
Supplement: Supplementary file 1 [file get_supplementary_file.php]

**Supplementary Table (Tracking sleep, temperature, heart rate, and daily symptoms across the menstrual cycle with the Oura ring in healthy women)**

| Inclusion demographics criteria |  |
| --- | --- |
|  | - Women - >= 12 year of education - Age range: 18-35 years old - Body mass index (BMI) <=30 kg.m-2 - English as the primary language |
| Inclusion menstrual cycle criteria |  |
|  | - Regular menstrual cycle, defined as: - Length of menstrual cycle 22-35 days - Length of menses <10 days - Natural menstrual cycle (i.e., do not use any type of hormonal contraceptive) - Do not have Premenstrual Dysphoric Disorder (PMDD) or severe Premenstrual Syndrome (PMS) |
| Inclusion sleep criteria |  |
|  | - Bedtime no later than 2 AM - Waketime no earlier than 5 AM and no later than 10 AM - Total sleep time more than 6 hours (at least, 7 hours in bed) - Do not have medical condition that may affect sleep (i.e., sleep apnea, clinical insomnia, restless leg syndrome, narcolepsy). |
| Exclusion health criteria |  |
|  | - Medical condition that may affect cerebral metabolism (e.g., cancer, cardiac, respiratory, diabetes, rheumatoid arthritis, or other chronic health conditions). - Psychiatric conditions (i.e., Major Depressive disorder, Generalized Anxiety Disorder, Bipolar Disorder, Personality Disorder, OCD, Schizophrenia). - Neurological conditions (i.e., epilepsy, traumatic brain injury, neurosurgery). - Abuse or dependence on substances (i.e., Cigarettes/ Marijuana/ Tobacco/ Hookah/ Nicotine gum/ Recreational drug/ Caffeinated products/ Alcoholic beverages). - Non-correctable vision and audition impairments. - Current use of any medications that could affect sleep, mood and/or cognition. |
